# Supplementary material for: Trends in the stability of covalent dative bonds with variable solvent polarity depend on the charge transfer in the Lewis electron-pair system
Source: Royal Society of Chemistry journal article supplement (doi:10.1039/d3cp03445c), 2023-01-01
Supplement: d3cp03445c1.pdf [file d3cp03445c1.pdf]

# Trends in the Stability of Covalent Dative Bonds with Variable Solvent Polarity Depend on the Charge Transfer in the Lewis Electron-Pair System

Rabindranath Lo,<sup>†a,b</sup> Debashree Manna,<sup>†a</sup> Vijay Madhav Miriyala,<sup>a,b</sup> Dana Nachtigallová,<sup>a,c</sup> and Pavel Hobza<sup>\*a,c</sup>

<sup>a</sup> Institute of Organic Chemistry and Biochemistry, Czech Academy of Sciences, v.v.i., Flemingovo nám. 2, 16000 Prague 6, Czech Republic.

<sup>b</sup> Regional Centre of Advanced Technologies and Materials, Czech Advanced Technology and Research Institute, Palacký University Olomouc, Křížkovského 511/8, Olomouc 77900, Czech Republic

<sup>c</sup> IT4Innovations, VŠB-Technical University of Ostrava, 17. listopadu 2172/15, 70800 Ostrava-Poruba, Czech Republic

<sup>†</sup> Both authors contributed equally to this work and can be considered as the first author.

Email: [pavel.hobza@uochb.cas.cz](mailto:pavel.hobza@uochb.cas.cz)

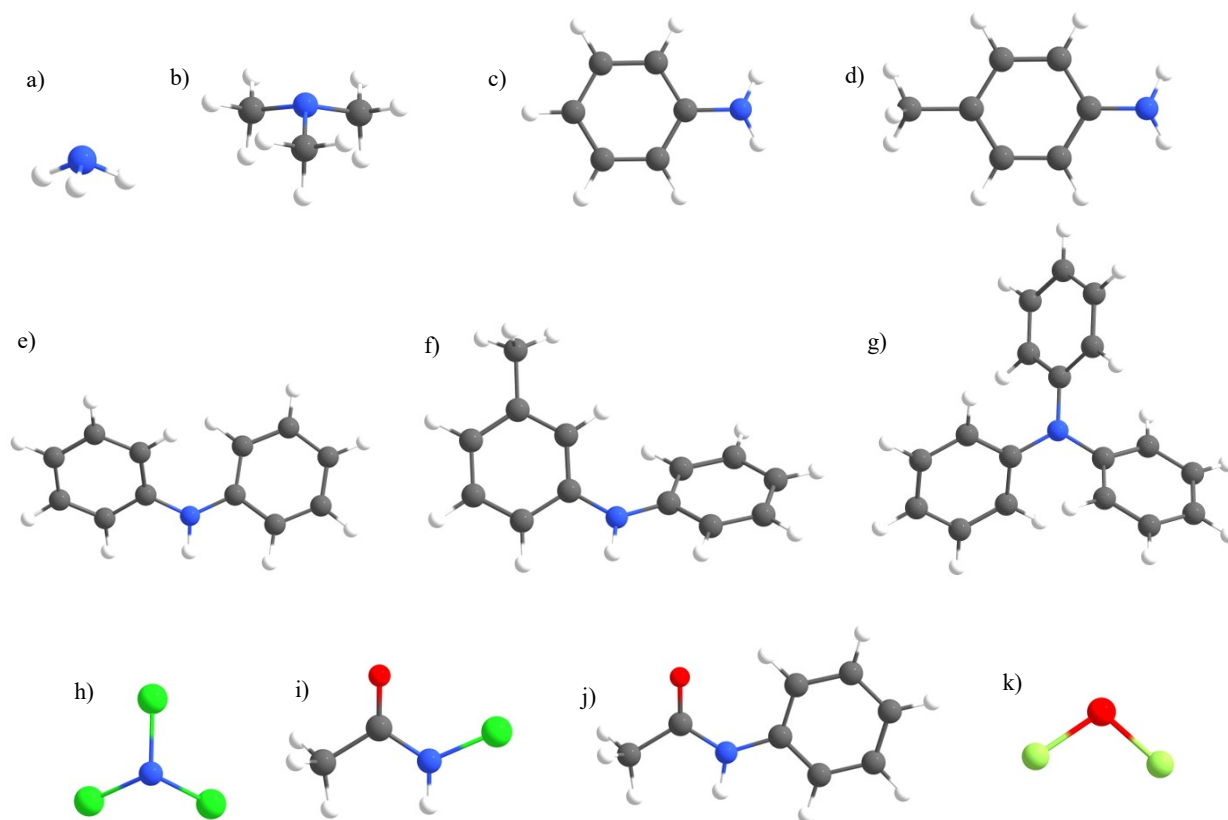

**Fig. S1** The donor molecules considered in this study. a)  $\text{NH}_3$ , b)  $\text{NMe}_3$ , c)  $\text{NH}_2\text{Ph}$ , d)  $\text{NH}_2\text{Ph}(4\text{-Me})$ , e)  $\text{NPh}_2$ , f)  $\text{NPhPh}(3\text{-Me})$ , g)  $\text{NPh}_3$ , h)  $\text{NCl}_3$ , i)  $\text{NHClCOMe}$ , j)  $\text{NPhCOMe}$  and k)  $\text{OF}_2$ . [C: grey, H: hydrogen, N: blue, O: red, Cl: green, F: yellowish green]

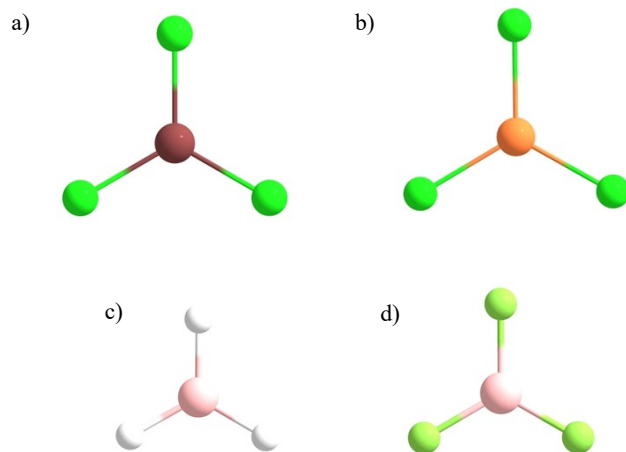

**Fig. S2** The acceptor molecules considered in this study. a)  $\text{GaCl}_3$ , b)  $\text{InCl}_3$ , c)  $\text{BH}_3$  and d)  $\text{BF}_3$ . [H: hydrogen, Cl: yellowish green, B: pink, Ga: brown, In: dark orange]

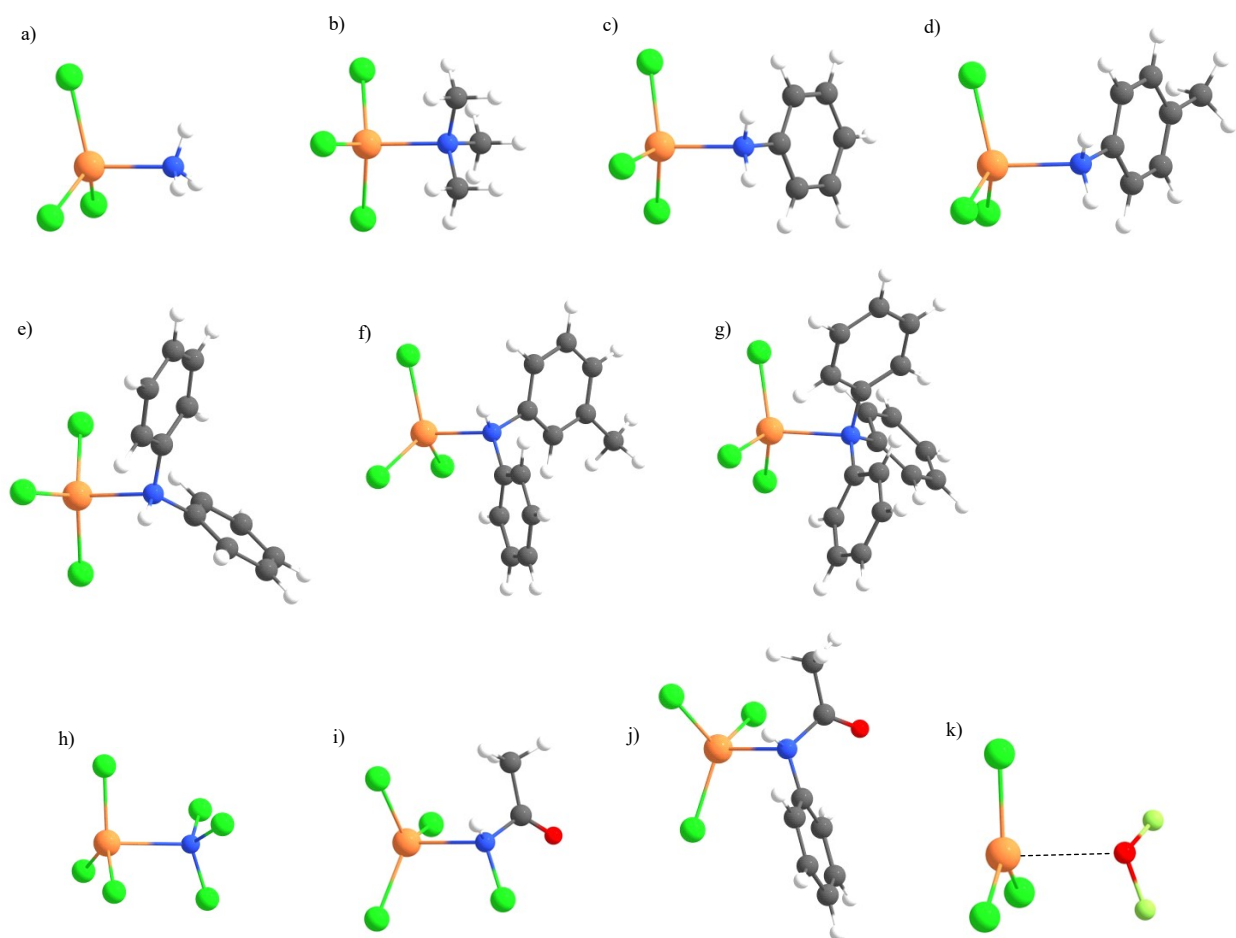

**Fig. S3** The optimized geometries of  $\text{InCl}_3$  complexes with various donor molecules. a)  $\text{InCl}_3\text{-NH}_3$ , b)  $\text{InCl}_3\text{-NMe}_3$ , c)  $\text{InCl}_3\text{-NH}_2\text{Ph}$ , d)  $\text{InCl}_3\text{-NH}_2\text{Ph(4-Me)}$ , e)  $\text{InCl}_3\text{-NHPh}_2$ , f)  $\text{InCl}_3\text{-NHPhPh(3-Me)}$ , g)  $\text{InCl}_3\text{-NPh}_3$ , h)  $\text{InCl}_3\text{-NCl}_3$ , i)  $\text{InCl}_3\text{-NHClCOMe}$ , j)  $\text{InCl}_3\text{-NHPhCOMe}$  and k)  $\text{InCl}_3\text{...OF}_2$ . [C: grey, H: hydrogen, N: blue, O: red, Cl: green, F: yellowish green, In: dark orange]

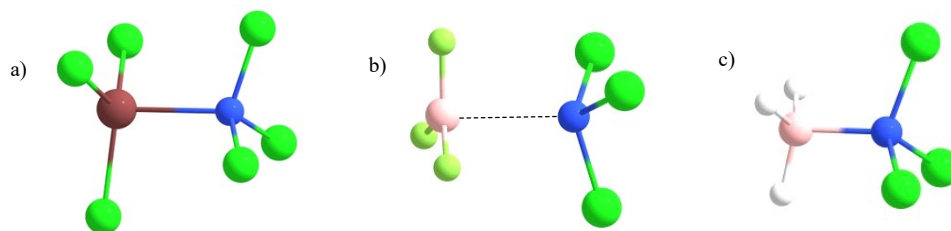

**Fig. S4** The optimized geometries of  $\text{NCl}_3$  complexes with various acceptor molecules. a)  $\text{NCl}_3\text{-GaCl}_3$ , b)  $\text{NCl}_3\text{...BF}_3$  and c)  $\text{NCl}_3\text{-BH}_3$ . [H: hydrogen, Cl: yellowish green, B: pink, Ga: brown, N: blue]

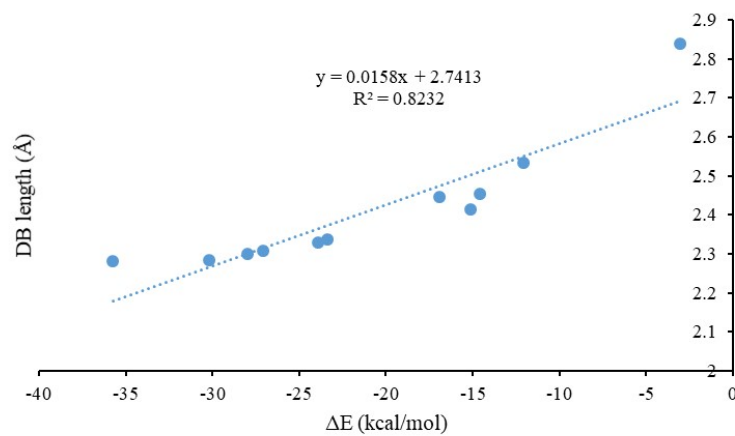

**Fig. S5** The correlation of interaction energy ( $\Delta E$ ) with dative bond length (Å).

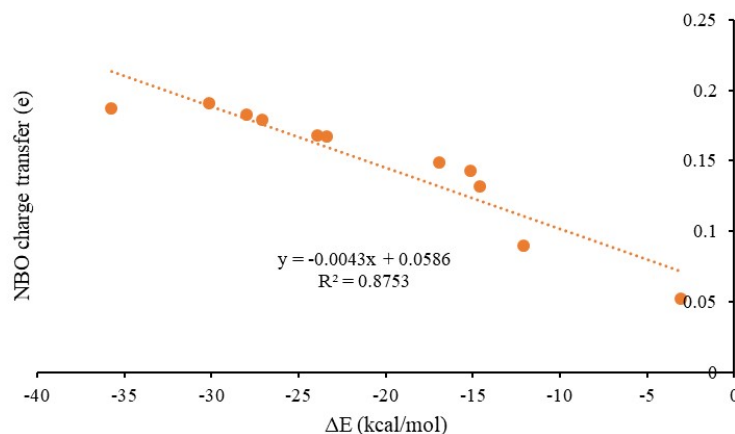

**Fig. S6** The correlation of interaction energy ( $\Delta E$ ) with NBO charge transfer (e).

### Computation

Structures of all subsystems and complexes were optimized at the DFT-D level using the PBE0-D3<sup>1,2</sup> functional with zero damping and def2-QZVP basis set.<sup>3</sup> The binding free energies ( $\Delta G_{\text{calc}}$ ) at 298 K were

determined using the rigid rotor–harmonic oscillator–ideal gas approximation at the same computational level.

Solvents considered were modelled with the COSMO continuous solvation model;<sup>4</sup> reliability of the model with respect to other continuous solvent models as well as to explicit solvent model was verified in our earlier papers.<sup>5,6</sup> In the present paper the COSMO model will be used only for aprotic non-donor solvents. Solvent in the continuous model is characterized by its dielectric constants  $\epsilon$ , which amounts to 1.0, 2.6, 4.8, 8.9 and 9.99 for the gas phase, carbon disulfide, chloroform, dichloromethane and o-dichlorobenzene (DCB), respectively. The respective solvation energy consists of electrostatic and non-electrostatic terms,

$$\Delta E_{\text{solv}} = \Delta E_{\text{solv}}(\text{elec}) + \Delta E_{\text{solv}}(\text{non-elec}), \quad (\text{S1})$$

where the latter term is formed by dispersion, H-bonding, cavity and surface contributions. The surface contribution is estimated using the solvent accessible surface area (SASA). The solvation energy of the system is calculated as a difference between the energy of the optimized system in the solvent and the energy of that geometry in the gas phase; by construction the solvation energy is negative. The change of solvation energy ( $\Delta E_{\text{solv}}$ ) is defined as a difference between the solvation energies of the complex and separated subsystems, respectively. A negative value of  $\Delta E_{\text{solv}}$  indicates higher stabilization of the complex with respect of subsystems while its positive value indicates opposite. DB stability increase with increasing solvent polarity is connected with the negative  $\Delta E_{\text{solv}}$  while the DB stability decrease with positive  $\Delta E_{\text{solv}}$ .

For few complexes involving heavy elements (In, Ga) relativistic effects are incorporated using relativistic-ZORA mostly at PBE0-D3/ZORA-def2-TZVP level. Only for In, SARC-ZORA-TZVP basis has been used. We have also used the SARC/J auxiliary basis set, which is more accurate for relativistic ZORA calculations.

Charge transfer (CT) was determined using the NBO analyses.<sup>7</sup> Throughout the paper the Gaussian 16 program package<sup>8</sup> was utilized. Mayer bond order was calculated at PBE0-D3/def2-QZVP level of theory.

The constrained DFT (cDFT) calculations<sup>9</sup> which eliminate the charge transfer in the Lewis electron-pair system were performed at PBE0-D3/def2-TZVP level using NWChem version 7.0.2.<sup>10</sup> For few complexes, the cDFT calculations were performed at PBE0-D3/def2-QZVP level. The technique was applied not only for determination of total and solvation energies but also of complex dipole moments. The Löwdin charge transfer (in e) values were calculated using NWChem version 7.0.2.

Molecular dynamics (MD) simulations with the explicit solvent model were performed for selected systems to verify the reliability of the continuous solvent model. In particular, the MD simulations were performed for  $\text{InCl}_3\text{—NH}_3$ ,  $\text{InCl}_3\text{—NCl}_3$ ,  $\text{GaCl}_3\text{—NCl}_3$  and  $\text{BH}_3\text{—NCl}_3$  complexes in vacuo and embedded in a cluster of 20 molecules of carbon disulfide and 10 molecules of DCB in a cubic restraint box of 20 Å length. Molecular dynamics trajectories were simulated by ORCA 5.0.3 code<sup>11</sup> and visualized by VMD 1.9.2 visualization software.<sup>12</sup> All the simulations were performed at the PBE0-D3BJ/6-31G\* level of theory. The simulation time was performed up to 10 ps for calculations involving solvents and also for gas phase. In the simulation, the step size was set to 1 fs, Nose–Hoover chain thermostat (NHC) with high-order Yoshida integrator<sup>13,14</sup> with time constant of 20 fs was employed to control the temperatures. The temperature for all the simulations was set at 300 K. Average distances of the central bond in respective solvents were calculated for each complexes in various solvents.

Electrostatic potential of a molecule is obtained from the formatted chk files calculated by Gaussian 16<sup>8</sup> at PBE0-D3/def2-QZVP level. The  $V_{s,\text{max}}$  and  $V_{s,\text{min}}$  values are calculated using Multiwfn 3.6 software.<sup>15</sup>

## Results

### Molecular Dynamics Simulations

The results obtained from the continuous solvent model have been verified using a more reliable explicit solvent model. The results obtained from both the models are in good agreement.  $\text{InCl}_3\text{-NH}_3$  is stable in the gas and in both explicit  $\text{CS}_2$  and DCB with In-N bond lengths of 2.297, 2.310 and 2.298 Å respectively, while  $\text{InCl}_3\text{-NCl}_3$  is stable in the gas and explicit  $\text{CS}_2$  with In-N distance of 2.466 Å and 2.568 Å, respectively but becomes weaker in explicit DCB with In-N distance of 2.697 Å.  $\text{NCl}_3\text{-BH}_3$  on the other hand remains stable in the gas, explicit  $\text{CS}_2$  and DCB with a B-N bond length of 1.641, 1.667 Å and 1.661 Å. The  $\text{GaCl}_3\text{-NCl}_3$  complex remains stable in the gas but becomes weaker in explicit  $\text{CS}_2$  and DCB with a Ga-N bond length of 2.186 Å, 2.261 Å and 2.404 Å, respectively. Plots of the trajectories  $\sim 10$  ps for all the complexes in the gas,  $\text{CS}_2$  and DCB are given below (Figs. S7-S10). It can be seen that  $\text{InCl}_3\text{-NH}_3$  and  $\text{BH}_3\text{-NCl}_3$  complexes are stabilized in the gas,  $\text{CS}_2$  and DCB, while  $\text{InCl}_3\text{-NCl}_3$  and  $\text{GaCl}_3\text{-NCl}_3$  become weaker upon passing from  $\text{CS}_2$  and DCB.

**Table S1** Interaction energy ( $\Delta E$ ), binding free energy ( $\Delta G$ ) (in kcal/mol, T = 298 K) of various DB complexes in different solvents calculated at PBE0-D3/ZORA-def2-TZVP level of theory using relativistic ZORA approach.

| Complex                                          | $\Delta G$ | $\Delta E$ |
|--------------------------------------------------|------------|------------|
| <b><math>\text{InCl}_3\text{...NH}_3</math></b>  |            |            |
| Gas                                              | -16.87     | -29.41     |
| $\text{CS}_2$                                    | -19.03     | -31.83     |
| Chloroform                                       | -19.35     | -32.32     |
| DCM                                              | -21.44     | -34.47     |
| DCB                                              | -21.61     | -34.64     |
|                                                  |            |            |
| <b><math>\text{InCl}_3\text{...NCl}_3</math></b> |            |            |
| Gas                                              | 5.32       | -8.55      |
| $\text{CS}_2$                                    | 6.15       | -7.71      |
| Chloroform                                       | 7.24       | -6.63      |
| DCM                                              | 6.76       | -7.07      |
| DCB                                              | 6.79       | -7.04      |
|                                                  |            |            |
| <b><math>\text{GaCl}_3\text{...NCl}_3</math></b> |            |            |
| Gas                                              | 5.77       | -8.43      |
| $\text{CS}_2$                                    | 5.94       | -8.37      |
| Chloroform                                       | 6.06       | -8.30      |
| DCM                                              | 5.97       | -8.41      |
| DCB                                              | 5.96       | -8.42      |

**Table S2** Interaction energy ( $\Delta E$ ), binding free energy ( $\Delta G$ ) (in kcal/mol, T = 298 K) of various DB complexes in different solvents calculated at MP2/def2-TZVP level of theory.

| Complex                                           | $\Delta G$ | $\Delta E$ |
|---------------------------------------------------|------------|------------|
| <b>InCl<sub>3</sub>... NH<sub>2</sub>Ph(4-Me)</b> |            |            |
| Gas                                               | -20.78     | -33.30     |
| CS <sub>2</sub>                                   | -21.51     | -34.47     |
| DCB                                               | -22.96     | -35.70     |
| <b>InCl<sub>3</sub>...NHPH2</b>                   |            |            |
| Gas                                               | -18.97     | -32.82     |
| CS <sub>2</sub>                                   | -18.63     | -32.71     |
| DCB                                               | -18.54     | -32.83     |
| <b>InCl<sub>3</sub>...NHPHPh(3-Me)</b>            |            |            |
| Gas                                               | -19.68     | -33.50     |
| CS <sub>2</sub>                                   | -19.12     | -33.33     |
| DCB                                               | -18.76     | -33.47     |

**Table S3** Mayer bond order of complexes in various solvents.

| Complex                                   | Mayer bond order |
|-------------------------------------------|------------------|
| <b>InCl<sub>3</sub>...NH<sub>3</sub></b>  |                  |
| Gas                                       | 0.357            |
| CS <sub>2</sub>                           | 0.441            |
| Chloroform                                | 0.494            |
| DCM                                       | 0.498            |
| DCB                                       | 0.502            |
|                                           |                  |
| <b>InCl<sub>3</sub>...NCl<sub>3</sub></b> |                  |
| Gas                                       | 0.234            |
| CS <sub>2</sub>                           | 0.249            |
| Chloroform                                | 0.255            |
| DCM                                       | 0.259            |
| DCB                                       | 0.260            |
|                                           |                  |
| <b>GaCl<sub>3</sub>...NCl<sub>3</sub></b> |                  |
| Gas                                       | 0.292            |
| CS <sub>2</sub>                           | 0.319            |
| Chloroform                                | 0.329            |
| DCM                                       | 0.336            |
| DCB                                       | 0.336            |

**Table S4** NBO Charge transfer (in e) of complexes with explicit solvent molecules calculated at PBE0-D3/def2tzvpp.

| Complex                               | CT    |
|---------------------------------------|-------|
| InCl <sub>3</sub> ...NH <sub>3</sub>  |       |
| Gas                                   | 0.169 |
| CS <sub>2</sub>                       | 0.17  |
| DCB                                   | 0.173 |
|                                       |       |
| InCl <sub>3</sub> ...NCl <sub>3</sub> |       |
| Gas                                   | 0.08  |
| CS <sub>2</sub>                       | 0.126 |
| DCB                                   | 0.128 |
|                                       |       |
| BH <sub>3</sub> ...NCl <sub>3</sub>   |       |
| Gas                                   | 0.202 |
| CS <sub>2</sub>                       | 0.238 |
| DCB                                   | 0.243 |
|                                       |       |
| GaCl <sub>3</sub> ...NCl <sub>3</sub> |       |
| Gas                                   | 0.104 |
| CS <sub>2</sub>                       | 0.113 |
| DCB                                   | 0.124 |

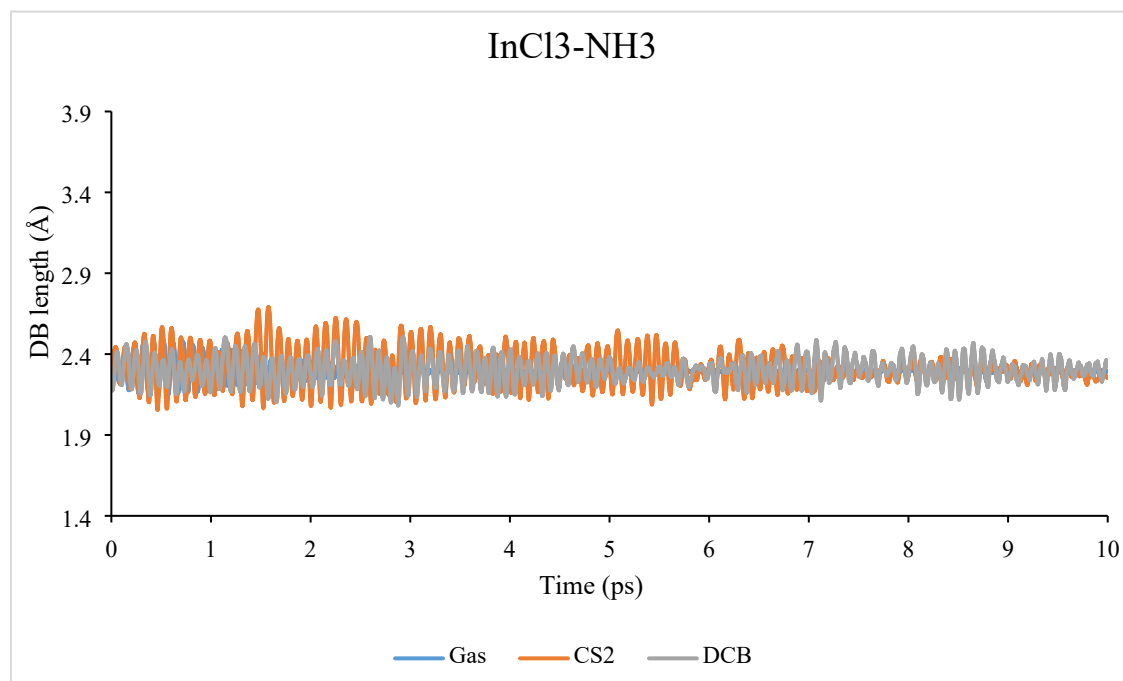

**Fig. S7** Molecular dynamics simulations of InCl<sub>3</sub>-NH<sub>3</sub> complex in various medium at 300K.

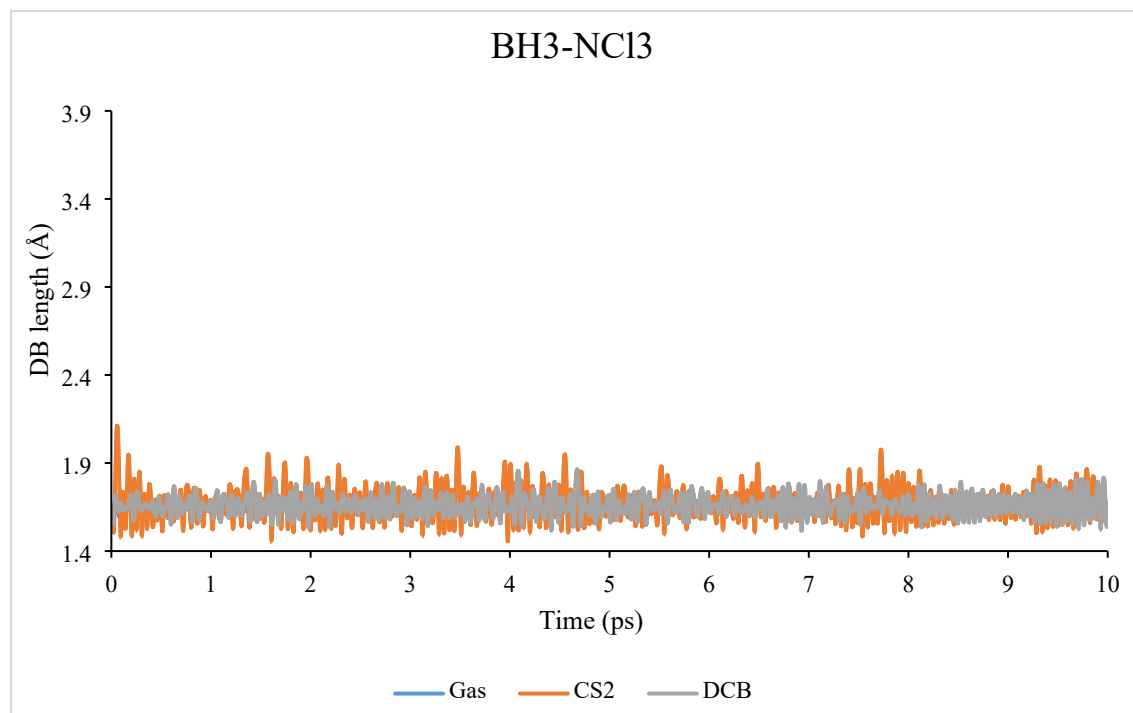

**Fig. S8** Molecular dynamics simulations of BH<sub>3</sub>-NCl<sub>3</sub> complex in various medium at 300K.

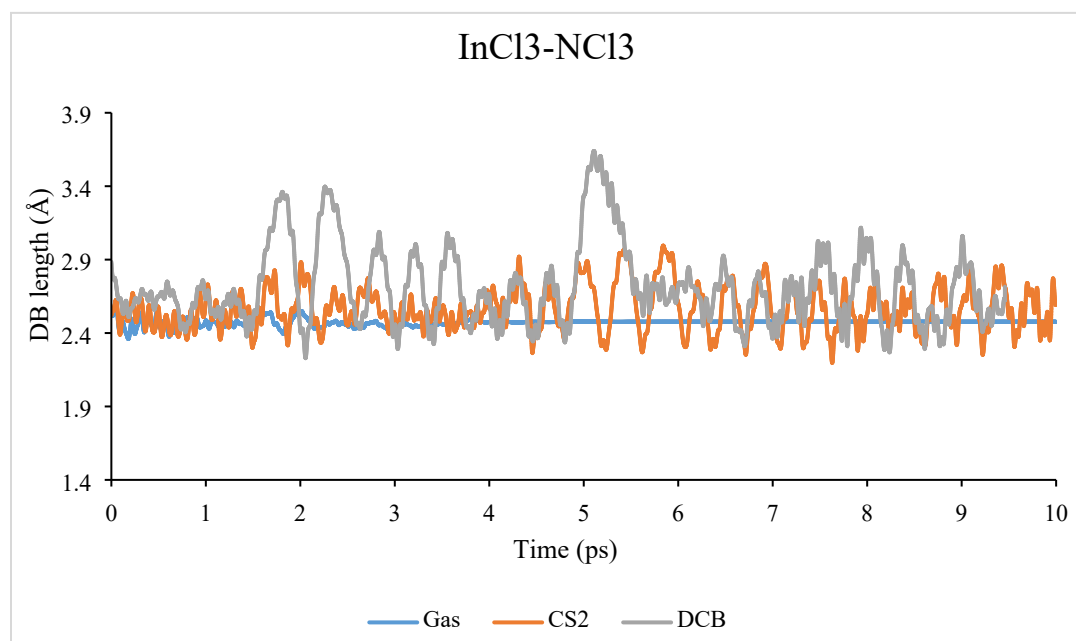

**Fig. S9** Molecular dynamics simulations of InCl<sub>3</sub>-NCl<sub>3</sub> complex in various medium at 300K.



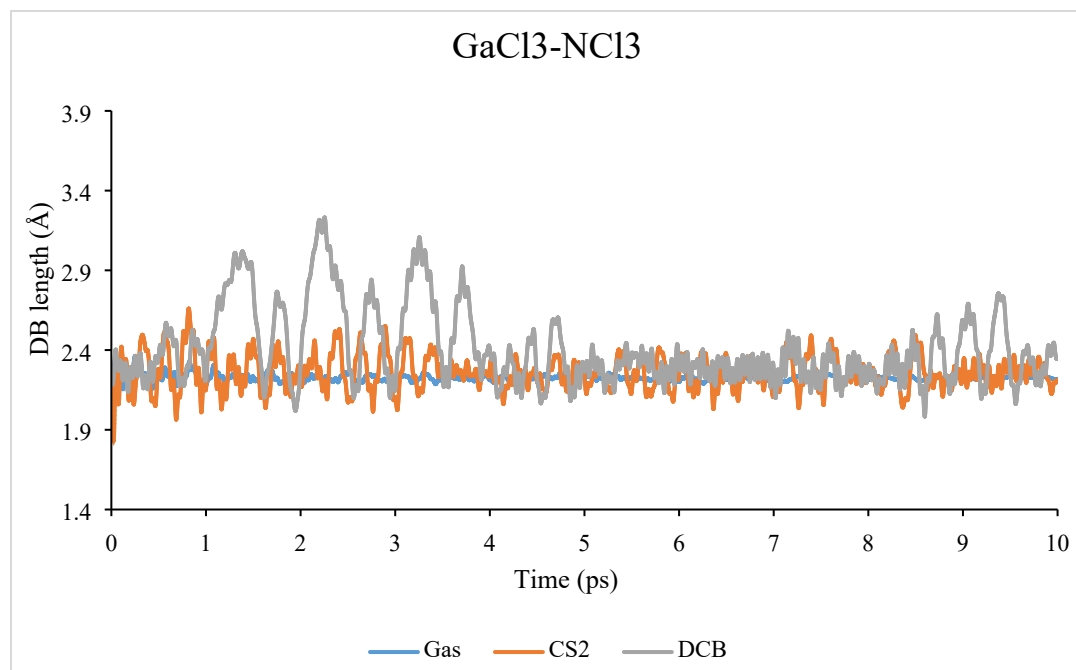

**Fig. S10** Molecular dynamics simulations of GaCl<sub>3</sub>-NCl<sub>3</sub> complex in various medium at 300K.

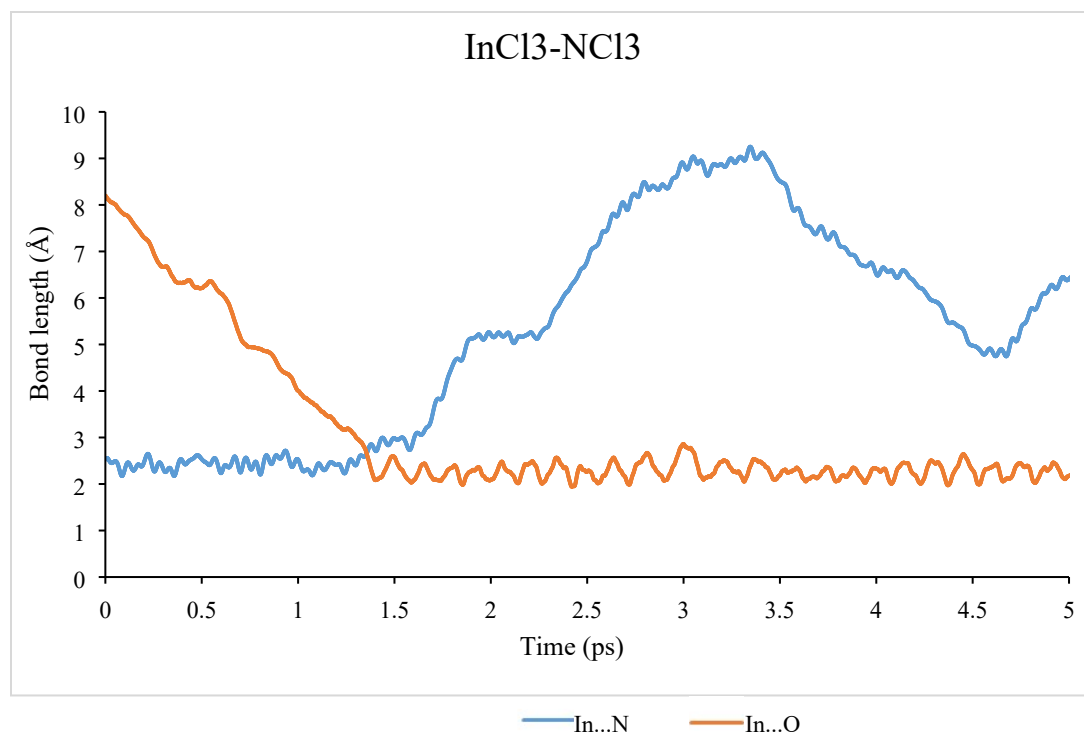

**Fig. S11** Molecular dynamics simulations of InCl<sub>3</sub>-NCl<sub>3</sub> complex in acetone medium at 300K.

## References

1. C. Adamo and V. Barone, *J. Chem. Phys.*, 1999, **110**, 6158.

2. S. Grimme, J. Antony, S. Ehrlich and H. Krieg, *J. Chem. Phys.*, 2010, **132**, 154104.
3. F. Weigend, *J. Comput. Chem.*, 2008, **29**, 167.
4. A. Klamt and G. Schurmann, *J. Chem. Soc., Perkin Trans.*, 1993, **2**, 799.
5. V. M. Miriyala, R. Lo, P. Bouř, T. Wu, D. Nachtigallová and P. Hobza, *J. Phys. Chem. A*, 2022, **126**, 7938–7943.
6. R. Lo, D. Manna, M. Lamanec, M. Dračinský, P. Bouř, T. Wu, G. Bastien, J. Kaleta, V. M. Miriyala, V. Špirko, A. Mašínová, D. Nachtigallová and P. Hobza, *Nat. Commun.*, 2022, **13**, 2107.
7. A. E. Reed, L. A. Curtiss and F. Weinhold, *Chem. Rev.*, 1988, **88**, 899.
8. Gaussian 16, Revision A.03, M. J. Frisch, G. W. Trucks, H. B. Schlegel, G. E. Scuseria, M. A. Robb, J. R. Cheeseman, G. Scalmani, V. Barone, G. A. Petersson, H. Nakatsuji, et al. Gaussian, Inc. Wallingford, CT, **2016**.
9. B. Kaduk, T. Kowalczyk and T. Van Voorhis, *Chem. Rev.*, 2012, **112**, 321 and references therein.
10. E. Apra, E. J. Bylaska, W. A. De Jong, N. Govind, K. Kowalski, T. P. Straatsma, M. Valiev, H. van Dam, Y. Alexeev, J. Anchell, et al. *J. Chem. Phys.*, 2020, **152**, 184102.
11. F. Neese, *WIREs Comput Mol Sci.* 2022, **12**, e1606.
12. W. Humphrey, A. Dalke and K. Schulten, *J. Mol. Graph.*, 1996, **14**, 33.
13. G. J. Martyna, M. L. Klein, M. Tuckerman, *J. Chem. Phys.*, 1992, **97**, 2635.
14. G. J. Martyna, M. E. Tuckerman, D. J. Tobias, M. L. Klein, *Mol. Phys.*, 1996, **87**, 1117.
15. T. Lu, F. Chen, Multiwfn: A Multifunctional Wavefunction Analyzer. *J. Comput. Chem.* 2012, **33** (5), 580.
